# Supplementary material
Source: publisher figshare collection journal article supplement (https://acs.figshare.com/ndownloader/files/14083811)
Supplement: Supplementary file 1 [file 14083811]

---

## Supporting Information

# Pd-Ag@CeO<sub>2</sub> Catalyst of Core-shell Structure for Low Temperature Oxidation of Toluene Under Visible Light Irradiation

**Jian Gao<sup>1,2</sup>, Zhichun Si<sup>\*1</sup>, Yunfan Xu<sup>2</sup>, Liping Liu<sup>2</sup>, Yuanyuan Zhang<sup>1,2</sup>,**

**Xiaodong Wu<sup>2</sup>, Rui Ran<sup>2</sup>, Duan Weng<sup>2</sup>**

*<sup>1</sup>Graduate School at Shenzhen, Tsinghua University, Shenzhen City, 518055, China*

*<sup>2</sup>The Key Laboratory of Advanced Materials of Ministry of Education, School of Materials  
Science and Engineering, Tsinghua University, Beijing City, 10084, China*

---

\* Co-corresponding author: Zhichun Si (si.zhichun@sz.tsinghua.edu.cn);

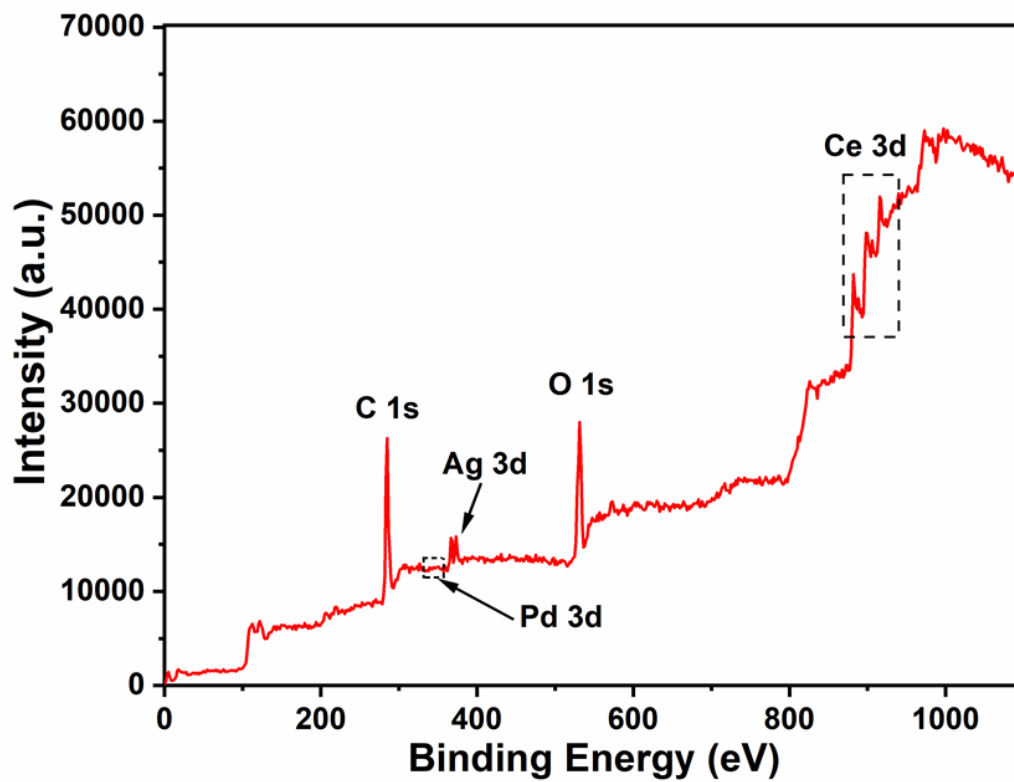

Figure S1. XPS survey spectra for PdAgCe catalyst

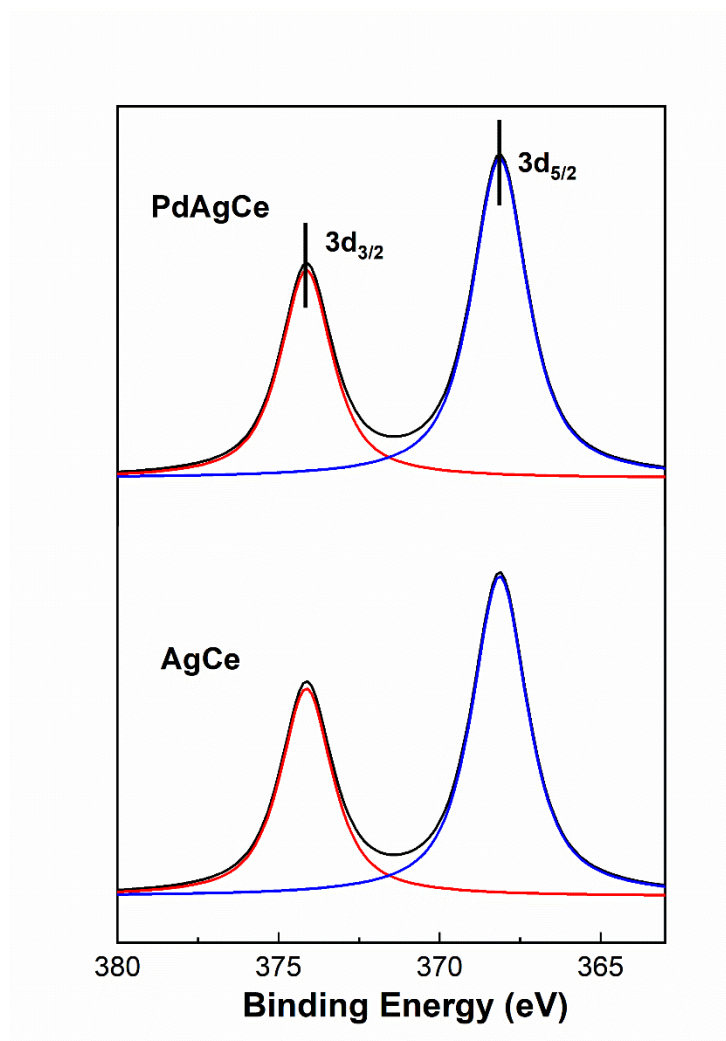

Figure S2. Ag<sub>3d</sub> XPS spectra for AgCe and PdAgCe catalysts

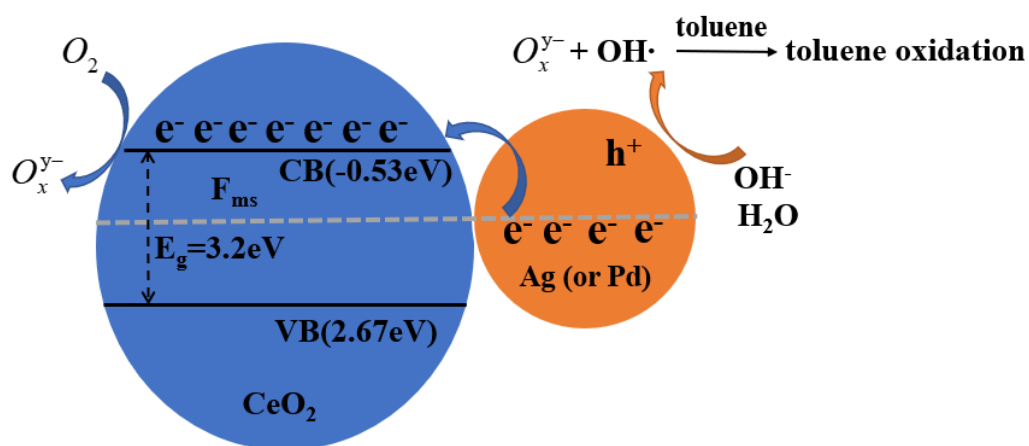

Figure S3. Proposed photo oxidation mechanism of toluene on PdAgCe catalyst

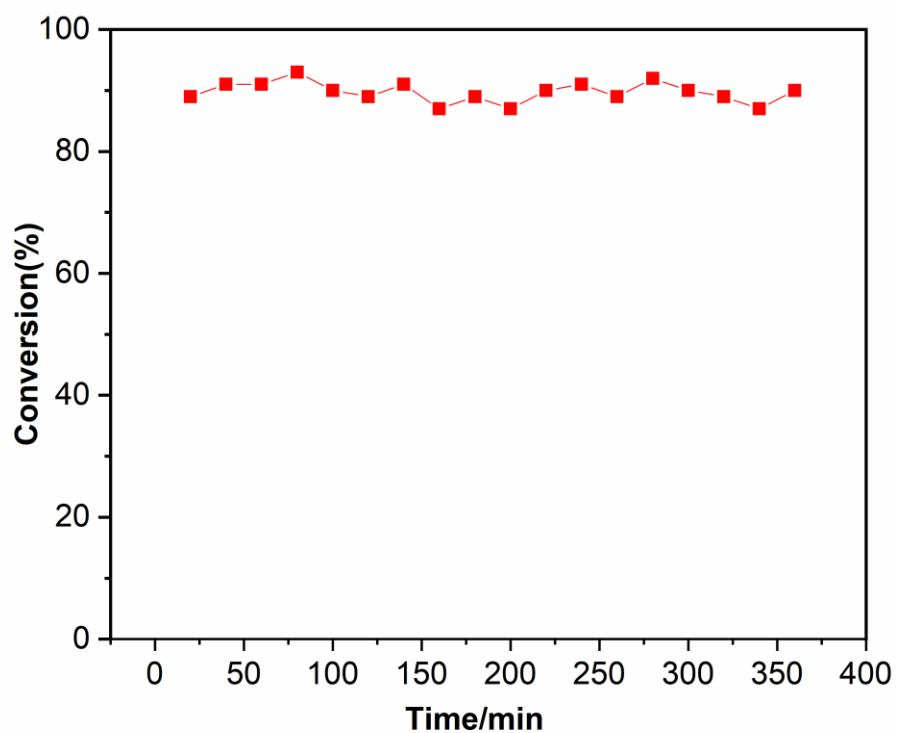

Figure S4. Stability of PdAgCe catalyst at 160°C with visible light irradiation
